# Supplementary material for: Alternative synthetic approaches for metal–organic frameworks: transformation from solid matters
Source: Royal Society of Chemistry journal article supplement (doi:10.1039/c6cc07094a), 2016-10-03
Supplement: c6cc07094a1.pdf [file c6cc07094a1.pdf]

## Electronic Supplementary Information (ESI)

---

### Alternative synthetic approaches for metal–organic frameworks: transformation from solid matters

Guowu Zhan and Hua Chun Zeng\*

Department of Chemical and Biomolecular Engineering, Faculty of Engineering, National University of Singapore, 10 Kent Ridge Crescent, Singapore 119260

\*Email: [chezhc@nus.edu.sg](mailto:chezhc@nus.edu.sg)

**Table S1** Summary of solid matters used for MOF syntheses.

| Solid matter                   | Organic ligand                                                                      | Reaction temperature                                               | Reaction time | Solvent               | Ref.           |
|--------------------------------|-------------------------------------------------------------------------------------|--------------------------------------------------------------------|---------------|-----------------------|----------------|
| ZnO                            | 2-methylimidazole                                                                   | 100°C                                                              | 24 h          | solvent-free          | <sup>1</sup>   |
| ZnO                            | 2-methylimidazole                                                                   | 100°C                                                              | 30 min        | solid-vapor reaction  | <sup>2</sup>   |
| Al <sub>2</sub> O <sub>3</sub> | 1,4-naphthalenedicarboxylic acid                                                    | 180°C                                                              | 1 to 10 min   | water                 | <sup>3</sup>   |
| Al <sub>2</sub> O <sub>3</sub> | 4,4',4'',4'''-(porphyrin-5,10,15,20-tetrayl)tetrabenzoic acid (H <sub>4</sub> TCPP) | 140°C                                                              | 10 min        | DMF/H <sub>2</sub> O  | <sup>4,5</sup> |
| Bi <sub>2</sub> O <sub>3</sub> | salicylic acid                                                                      | room temperature (slight increase due to friction by ball milling) | 10 to 60 min  | solvent-free          | <sup>6</sup>   |
| Cu <sub>2</sub> O              | benzene-1,3,5-tricarboxylic acid                                                    | room temperature                                                   | several hours | water, ethanol, DMF   | <sup>7-9</sup> |
| CuO                            | benzene-1,3,5-tricarboxylic acid                                                    | room temperature                                                   | 1 h           | ethanol/water mixture | <sup>10</sup>  |

|                                                   |                                                                                    |                            |                                              |                                                                                                     |                  |
|---------------------------------------------------|------------------------------------------------------------------------------------|----------------------------|----------------------------------------------|-----------------------------------------------------------------------------------------------------|------------------|
| V <sub>2</sub> O <sub>5</sub>                     | 1,4-naphthalenedicarboxylic acid                                                   | 180°C                      | 1 s to 1 h                                   | water                                                                                               | <sup>11</sup>    |
| ZnO                                               | 2-methylimidazole                                                                  | 100–160°C                  | varied depending on the conditions           | solvent-free, <sup>12</sup> or ethanol/octanol, <sup>13</sup> or DMF/H <sub>2</sub> O <sup>14</sup> | <sup>12-14</sup> |
| ZnO                                               | benzimidazole                                                                      | 50°C                       | 30 min under microwave radiation             | water/DMF mixture                                                                                   | <sup>14</sup>    |
| ZnO                                               | fumaric acid and 4,4'-dipyridyl or trans-1,2-bis(4-pyridyl)-ethylene               | < 33°C                     | 30 min                                       | liquid-assisted grinding                                                                            | <sup>15</sup>    |
| MgO, MnO, CoO, NiO, or ZnO                        | H <sub>4</sub> (dobpdc), dobpdc = 4,4'-dioxido-3,3'-biphenyldicarboxylate          | 120 °C                     | 10 min to 20 h                               | DMF                                                                                                 | <sup>16</sup>    |
| ZnO supported film                                | 2-methylimidazole                                                                  | room temperature           | 48 h                                         | methanol                                                                                            | <sup>17</sup>    |
| CoO or ZnO                                        | 2-methylimidazole                                                                  | 45°C, humid air            | 2 to 4 days; 15 days (without salt additive) | solvent free                                                                                        | <sup>18</sup>    |
| MgO, MnO, CoO, NiO, ZnO, CdO, PbO                 | oxalic acid                                                                        | 45°C or room temperature   | days                                         | high humidity                                                                                       | <sup>19</sup>    |
| Cu <sub>2</sub> O, Fe <sub>3</sub> O <sub>4</sub> | cyanometallate ions                                                                | 40°C                       | 30 min                                       | water                                                                                               | <sup>20</sup>    |
| Zn(OH) <sub>2</sub>                               | 3-(3-methyl-2-pyridyl)-5-(4-pyridyl)-1,2,4-triazole                                | 300°C                      | 16 h                                         | solvent-free                                                                                        | <sup>1</sup>     |
| Zn(OH) <sub>2</sub>                               | 2-methylimidazole (for preparation of ZIF-8), benzenedicarboxylic acid (for MOF-5) | room temperature, or 100°C | 24 h                                         | ethanol/water                                                                                       | <sup>21</sup>    |
| Zn(OH) <sub>2</sub>                               | 2-methylimidazole                                                                  | 30°C                       | 6 h                                          | ethanol/water                                                                                       | <sup>22</sup>    |
| Mg(OH) <sub>2</sub> / or MgO                      | 3-(3-methyl-2-pyridyl)-5-(4-pyridyl)-1,2,4-triazole                                | 300°C                      | 16 h                                         | solvent-free                                                                                        | <sup>1</sup>     |
| Co(OH) <sub>2</sub> /CoO                          | imidazole or 2-methylimidazole                                                     | 100°C or 160°C             | 48 h                                         | solvent-free                                                                                        | <sup>12</sup>    |
| ZnO and Ni(OH) <sub>2</sub>                       | adenine and monocarboxylic acids                                                   | 160°C                      | 6 to 60 min                                  | solvent free                                                                                        | <sup>23</sup>    |

|                                                                                        |                                                                                             |                                              |                    |                                        |       |
|----------------------------------------------------------------------------------------|---------------------------------------------------------------------------------------------|----------------------------------------------|--------------------|----------------------------------------|-------|
| Co(CO <sub>3</sub> ) <sub>0.5</sub> (OH)                                               | 2-methylimidazole                                                                           | room temperature                             | 24 h               | water                                  | 24    |
| rare-earth(III) carbonates                                                             | benzene-1,3,5-tricarboxylic acid                                                            | ball-milling, temperature was not controlled | 20 min             | liquid-assisted grinding               | 25    |
| rare earth sesquioxides                                                                | benzene-1,3,5-tricarboxylic acid                                                            | 20°C                                         | hours or days      | solvent vapors or moisture             | 26    |
| Cu <sub>2</sub> (OH) <sub>3</sub> NO <sub>3</sub>                                      | benzene-1,3,5-tricarboxylic acid                                                            | room temperature                             | 10 min             | ethanol                                | 27    |
| zinc slice                                                                             | benzene-1,3,5-tricarboxylic acid                                                            | 140°C                                        | 24 h               | water                                  | 28    |
| Cu(OH) <sub>2</sub> #                                                                  | benzene-1,3,5-tricarboxylic acid                                                            | room temperature                             | 5 min to 5 h       | H <sub>2</sub> O / ethanol mixture     | 29-32 |
| Cu(OH) <sub>2</sub>                                                                    | benzene-1,3,5-tricarboxylic acid                                                            | nil                                          | continuous process | solvent-assisted extrusion             | 33    |
| Zn(OH) <sub>2</sub>                                                                    | 1,4-benzenedicarboxylic acid                                                                | room temperature                             | 1 h                | DMF                                    | 32    |
| [Zn <sub>2</sub> (CO <sub>2</sub> ) <sub>2</sub> ][Zn <sub>3</sub> (OH) <sub>6</sub> ] | 2-methylimidazole                                                                           | 150 to 200°C                                 | continuous process | solvent-free                           | 33    |
| Cu(OH) <sub>2</sub>                                                                    | H <sub>2</sub> bdc, bpy (bdc <sup>2-</sup> = 1,4-benzenedicarboxylate; bpy=4,4'-bipyridine) | 60°C                                         | 7 days             | methanol                               | 34    |
| Al <sub>2</sub> O <sub>3</sub> , Al(OH) <sub>3</sub> , and AlO(OH)                     | 1,4-benzenedicarboxylic acid                                                                | 200°C                                        | 72 h               | water                                  | 35    |
| CaCO <sub>3</sub>                                                                      | 2,5-dihydroxybenzoquinone                                                                   | room temperature                             | 12 h               | water                                  | 36    |
| Cu substrate                                                                           | benzene-1,3,5-tricarboxylic acid                                                            | n.a.                                         | n.a.               | benzyl alcohol, DMF                    | 37,38 |
| Cu nanoparticles                                                                       | 2,5-dihydroxyterephthalic acid                                                              | 60°C                                         | 0 to 12 h          | ethanol, DMF                           | 39    |
| Pt–Ni alloy                                                                            | 2,5-dihydroxyterephthalic acid                                                              | 110°C                                        | 12 h               | DMF                                    | 40    |
| Cu <sub>2</sub> (OH) <sub>3</sub> (OAc)                                                | potassium or sodium hexacyanoferrate (II or III)                                            | room temperature                             | 15 h               | water                                  | 41    |
| porous anodic aluminum oxide (AAO)                                                     | benzene-1,3,5-tricarboxylic acid                                                            | 120°C                                        | 24 h               | water, with the aid of metal hydroxide | 42    |
| ZnSnO <sub>3</sub>                                                                     | 2-methylimidazole                                                                           | 180°C                                        | 12 h               | solvent-free                           | 43    |

|                      |                                  |                          |        |                                          |               |
|----------------------|----------------------------------|--------------------------|--------|------------------------------------------|---------------|
| Cu <sub>2</sub> O@Au | benzene-1,3,5-tricarboxylic acid | room temperature or 50°C | 40 min | ethanol and N,N-dimethyl acetamide (DMA) | <sup>44</sup> |
|----------------------|----------------------------------|--------------------------|--------|------------------------------------------|---------------|

**Notes:** Usually, the room temperature represents that the reactions were conducted without a particular means of temperature control.

<sup>#</sup> Cu(OH)<sub>2</sub> was obtained from the copper plates treated with NaOH solution.

## References

1. J.-B. Lin, R.-B. Lin, X.-N. Cheng, J.-P. Zhang and X.-M. Chen, *Chem. Commun.*, 2011, **47**, 9185-9187.
2. I. Stassen, M. Styles, G. Greci, H. V. Gorp, W. Vanderlinden, S. D. Feyter, P. Falcaro, D. D. Vos, P. Vereecken and R. Ameloot, *Nat. Mater.*, 2016, **15**, 304-310.
3. J. Reboul, S. Furukawa, N. Horike, M. Tsotsalas, K. Hirai, H. Uehara, M. Kondo, N. Louvain, O. Sakata and S. Kitagawa, *Nat. Mater.*, 2012, **11**, 717-723.
4. N. Kornienko, Y. Zhao, C. S. Kley, C. Zhu, D. Kim, S. Lin, C. J. Chang, O. M. Yaghi and P. Yang, *J. Am. Chem. Soc.*, 2015, **137**, 14129-14135.
5. Y. Zhao, N. Kornienko, Z. Liu, C. Zhu, S. Asahina, T.-R. Kuo, W. Bao, C. Xie, A. Hexemer, O. Terasaki, P. Yang and O. M. Yaghi, *J. Am. Chem. Soc.*, 2015, **137**, 2199-2202.
6. V. André, A. Hardeman, I. Halasz, R. S. Stein, G. J. Jackson, D. G. Reid, M. J. Duer, C. Curfs, M. T. Duarte and T. Frišić, *Angew. Chem. Int. Ed.*, 2011, **50**, 7858-7861.
7. Y. Liu, W. Zhang, S. Li, C. Cui, J. Wu, H. Chen and F. Huo, *Chem. Mater.*, 2014, **26**, 1119-1125.
8. G. Zhan and H. C. Zeng, *Chem. Commun.*, 2016, **52**, 8432-8435.
9. G. Zhan and H. C. Zeng, *Adv. Funct. Mater.*, 2016, **26**, 3268-3281.
10. Y. Guo, Y. Mao, P. Hu, Y. Ying and X. Peng, *ChemistrySelect*, 2016, **1**, 108-113.
11. J. Reboul, K. Yoshida, S. Furukawa and S. Kitagawa, *CrystEngComm*, 2015, **17**, 323-330.
12. M. Lanchas, D. Vallejo-Sanchez, G. Beobide, O. Castillo, A. T. Aguayo, A. Luque and P. Roman, *Chem. Commun.*, 2012, **48**, 9930-9932.
13. S. Li, W. Zhang, Y. Zhu, Q. Zhao and F. Huo, *Cryst. Growth Des.*, 2015, **15**, 1017-1021.
14. S. M. Meckler, C. Li, W. L. Queen, T. E. Williams, J. R. Long, R. Buonsanti, D. J. Milliron and B. A. Helms, *Chem. Mater.*, 2015, **27**, 7673-7679.
15. T. Friscic and L. Fabian, *CrystEngComm*, 2009, **11**, 743-745.
16. L. Maserati, S. M. Meckler, C. Li and B. A. Helms, *Chem. Mater.*, 2016, **28**, 1581-1588.
17. Y. Yue, Z.-A. Qiao, X. Li, A. J. Binder, E. Formo, Z. Pan, C. Tian, Z. Bi and S. Dai, *Cryst. Growth Des.*, 2013, **13**, 1002-1005.
18. C. Mottillo, Y. Lu, M.-H. Pham, M. J. Cliffe, T.-O. Do and T. Friscic, *Green Chem.*, 2013, **15**, 2121-2131.
19. F. Qi, R. S. Stein and T. Friscic, *Green Chem.*, 2014, **16**, 121-132.
20. F. Bu, L. Xu, W. Zhang, C. Jin, R. Qi, R. Huang and J. Jiang, *Chem. Commun.*, 2015, **51**, 6198-6201.
21. J. Li, W. Cao, Y. Mao, Y. Ying, L. Sun and X. Peng, *CrystEngComm*, 2014, **16**, 9788-9791.
22. P. Hu, Y. Yang, Y. Mao, J. Li, W. Cao, Y. Ying, Y. Liu, J. Lei and X. Peng, *CrystEngComm*, 2015, **17**, 1576-1582.

23. M. Lanchas, S. Arcediano, G. Beobide, O. Castillo, A. Luque and S. Perez-Yanez, *Inorg. Chem. Front.*, 2015, **2**, 425-433.
24. D. Yu, L. Ge, B. Wu, L. Wu, H. Wang and T. Xu, *J. Mater. Chem. A*, 2015, **3**, 16688-16694.
25. W. Yuan, J. O'Connor and S. L. James, *CrystEngComm*, 2010, **12**, 3515-3517.
26. X. Feng, C. Jia, J. Wang, X. Cao, P. Tang and W. Yuan, *Green Chem.*, 2015, **17**, 3740-3745.
27. T. Toyao, K. Liang, K. Okada, R. Ricco, M. J. Styles, Y. Tokudome, Y. Horiuchi, A. J. Hill, M. Takahashi, M. Matsuoka and P. Falcaro, *Inorg. Chem. Front.*, 2015, **2**, 434-441.
28. X. Zou, G. Zhu, I. J. Hewitt, F. Sun and S. Qiu, *Dalton Trans.*, 2009, 3009-3013.
29. K. Okada, R. Ricco, Y. Tokudome, M. J. Styles, A. J. Hill, M. Takahashi and P. Falcaro, *Adv. Funct. Mater.*, 2014, **24**, 1969-1977.
30. G. Majano and J. Pérez-Ramírez, *Adv. Mater.*, 2013, **25**, 1052-1057.
31. Y. Mao, L. Shi, H. Huang, W. Cao, J. Li, L. Sun, X. Jin and X. Peng, *Chem. Commun.*, 2013, **49**, 5666-5668.
32. Y. Mao, J. Li, W. Cao, Y. Ying, P. Hu, Y. Liu, L. Sun, H. Wang, C. Jin and X. Peng, *Nat. Commun.*, 2014, **5**, 5532.
33. D. Crawford, J. Casaban, R. Haydon, N. Giri, T. McNally and S. L. James, *Chem. Sci.*, 2015, **6**, 1645-1649.
34. K. Sumida, N. Moitra, J. Reboul, S. Fukumoto, K. Nakanishi, K. Kanamori, S. Furukawa and S. Kitagawa, *Chem. Sci.*, 2015, **6**, 5938-5946.
35. Z. Li, Y. Wu, J. Li, Y. Zhang, X. Zou and F. Li, *Chem. - Eur. J.*, 2015, **21**, 6913-6920.
36. K. Sumida, M. Hu, S. Furukawa and S. Kitagawa, *Inorg. Chem.*, 2016, **55**, 3700-3705.
37. Y. Tanihara, A. Nozaki, Y. Kuwahara, K. Mori and H. Yamashita, *B. Chem. Soc. Jpn.*, 2016, DOI: 10.1246/bcsj.20160169.
38. A. Nozaki, Y. Tanihara, Y. Kuwahara, K. Mori and H. Yamashita, *Chem. Lett.*, 2016, **45**, 976-978.
39. I. Luz, A. Lojudice, D. T. Sun, W. L. Queen and R. Buonsanti, *Chem. Mater.*, 2016, **28**, 3839-3849.
40. Z. Li, R. Yu, J. Huang, Y. Shi, D. Zhang, X. Zhong, D. Wang, Y. Wu and Y. Li, *Nat. Commun.*, 2015, **6**, 8248.
41. M. Lang, E. Delahaye, D. Foix, D. Ihiwakrim, O. Ersen, C. Leuvrey, J.-M. Grenèche, G. Rogez and P. Rabu, *Eur. J. Inorg. Chem.*, 2016, **2016**, 2030-2038.
42. Y. Mao, H. Huang, Y. Liu, L. Shi, W. Cao, J. Li, L. Sun and X. Peng, *CrystEngComm*, 2013, **15**, 5591-5593.
43. F. Cheng, W.-C. Li, J.-N. Zhu, W.-P. Zhang and A.-H. Lu, *Nano Energy*, 2016, **19**, 486-494.
44. Y. Liu, J. Zhang, L. Song, W. Xu, Z. Guo, X. Yang, X. Wu and X. Chen, *ACS Appl. Mater. Interfaces*, 2016, **8**, 22745-22750.
